# Supplementary material for: Genetic accommodation via modified endocrine signalling explains phenotypic divergence among spadefoot toad species
Source: PubMed Central journal article supplement (PMC5648835; doi:10.1038/s41467-017-00996-5), 2017-10-19
Supplement: 41467_2017_996_MOESM1_ESM.pdf [file 41467_2017_996_MOESM1_ESM.pdf]

**Supplementary Table 1. Statistical results from experiments testing the responsiveness of three spadefoot toad species to pond drying.**

| Model term                                             | df | -2 $\Delta$ LogLik | <i>P</i> |
|--------------------------------------------------------|----|--------------------|----------|
| <i>(A) Time to metamorphosis</i>                       |    |                    |          |
| Species                                                | 2  | 163.73             | <0.0001  |
| Water level                                            | 1  | 32.76              | <0.0001  |
| Species x Water level                                  | 2  | 49.76              | <0.0001  |
| <i>(B) Thyroid hormone – Differences across stages</i> |    |                    |          |
| Species                                                | 1  | 14.67              | 0.0001   |
| Stages                                                 | 1  | 25.90              | <0.0001  |
| Species x Treatment                                    | 1  | 1.29               | 0.255    |
| <i>(C) Corticosterone – Differences across stages</i>  |    |                    |          |
| Species                                                | 2  | 10.5               | 0.005    |
| Stages                                                 | 1  | 8.90               | 0.003    |
| Species x Treatment                                    | 2  | 2.91               | 0.234    |
| <i>(D) Metabolic rate - Differences across stages</i>  |    |                    |          |
| Species                                                | 2  | 88.37              | <0.0001  |
| Stages                                                 | 2  | 10.83              | 0.004    |
| Species x Treatment                                    | 4  | 22.38              | 0.0002   |
| <i>(E) Thyroid hormone – Response to water drop</i>    |    |                    |          |

|                       |   |       |        |
|-----------------------|---|-------|--------|
| Species               | 1 | 11.98 | 0.0005 |
| Water level           | 1 | 6.09  | 0.014  |
| Species x Water level | 1 | 11.68 | 0.0006 |

*(F) Corticosterone – Response to water drop*

|                       |   |       |         |
|-----------------------|---|-------|---------|
| Species               | 2 | 25.24 | <0.0001 |
| Water level           | 1 | 15.73 | <0.0001 |
| Species x Water level | 2 | 11.04 | 0.004   |

*(G) Metabolic rate – Response to water drop and hormonal manipulation*

|                     |   |        |         |
|---------------------|---|--------|---------|
| Species             | 2 | 158.48 | <0.0001 |
| Treatment           | 3 | 14.67  | 0.002   |
| Species x Treatment | 6 | 11.67  | 0.069   |

(A) We found differences in the timing of metamorphosis depending on the water level, but not all species showed the same degree of responsiveness. (B, C) Species showed constitutive, stage-matched differences in thyroid hormone and corticosterone levels. (D) Metabolic rate also differed among species and developmental stages. (E, F) Thyroid hormone and corticosterone increased in response to pond drying, but species differed in the extent of this endocrine regulation. (G) Metabolic rate varied across species and in response to addition of exogenous corticosterone or reduced water level, but not all species were equally responsive.
